# Supplementary material for: Transcription Factor Networks in Leaves of Cichorium endivia: New Insights into the Relationship between Photosynthesis and Leaf Development
Source: MDPI journal article supplement (doi:10.3390/plants8120531), 2019-11-21

**Figure S1.** Determination of the optimum number of clusters for K-means analysis: **(a)** output of the sum of squared error (SSE) method; **(b)** output the average silhouette width method

(a)

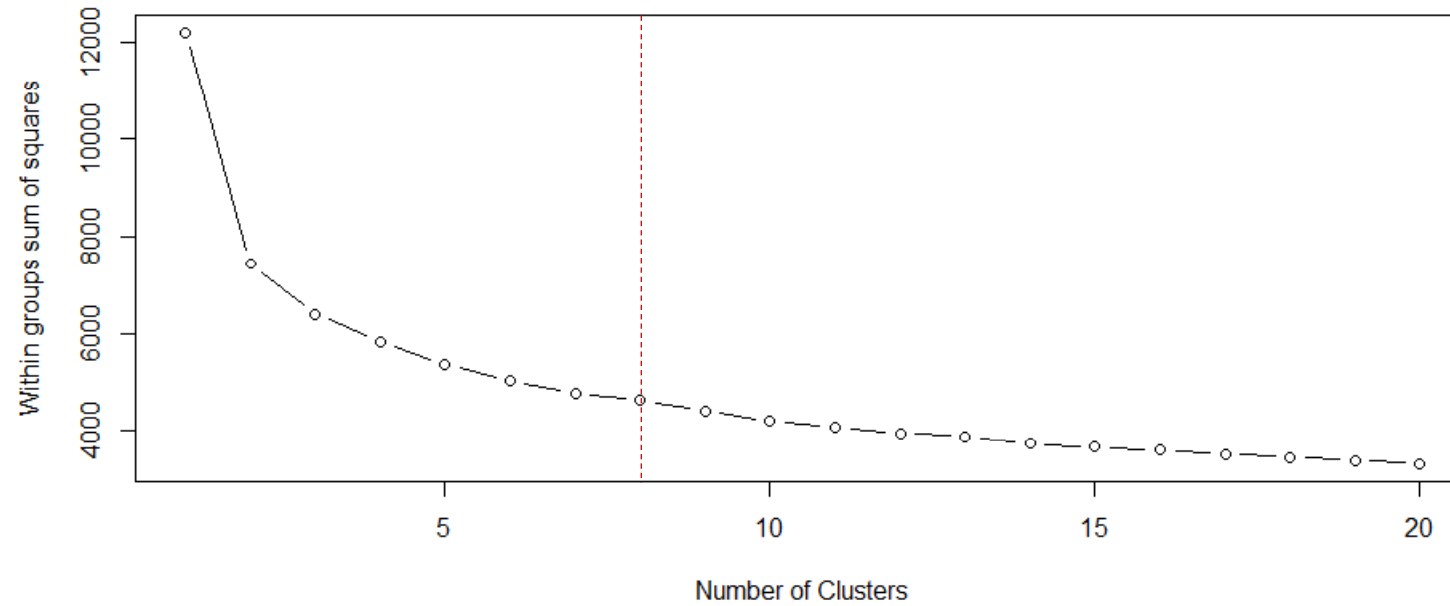

(b)

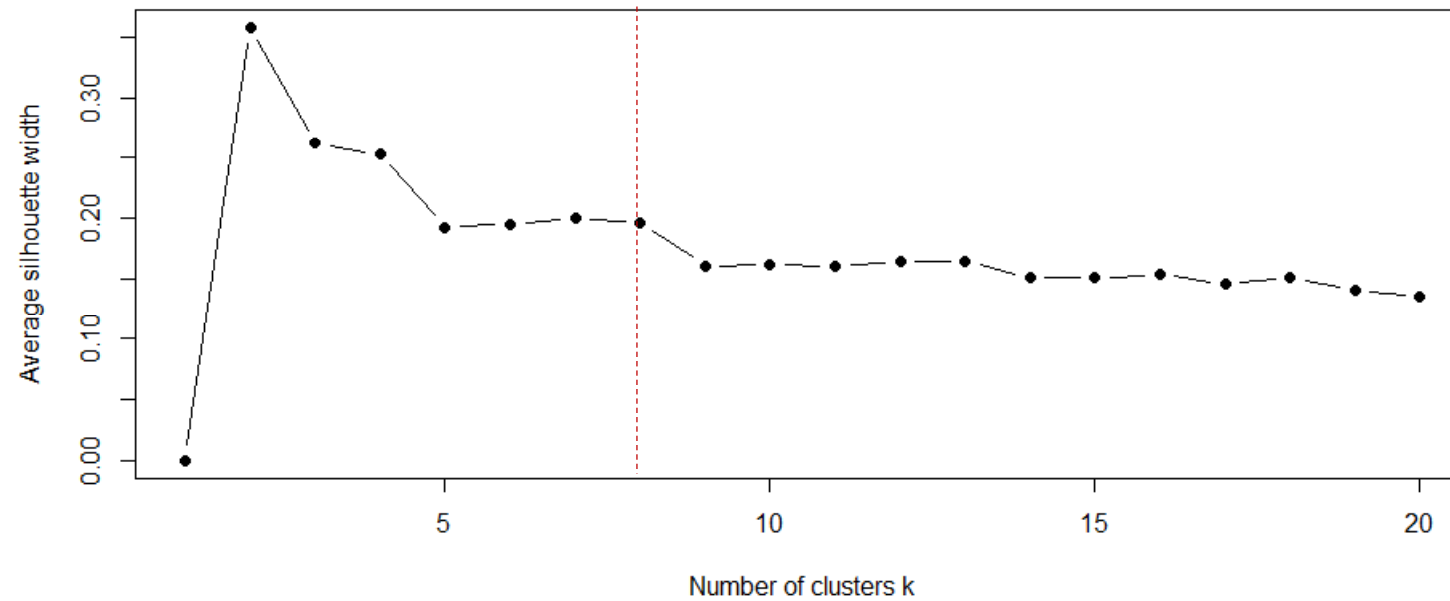

**Figure S2.** Determination of the optimum number of clusters for K-means analysis: **(a)** output of Calinski–Harabasz index method; **(b)** output of the Gap statistic method

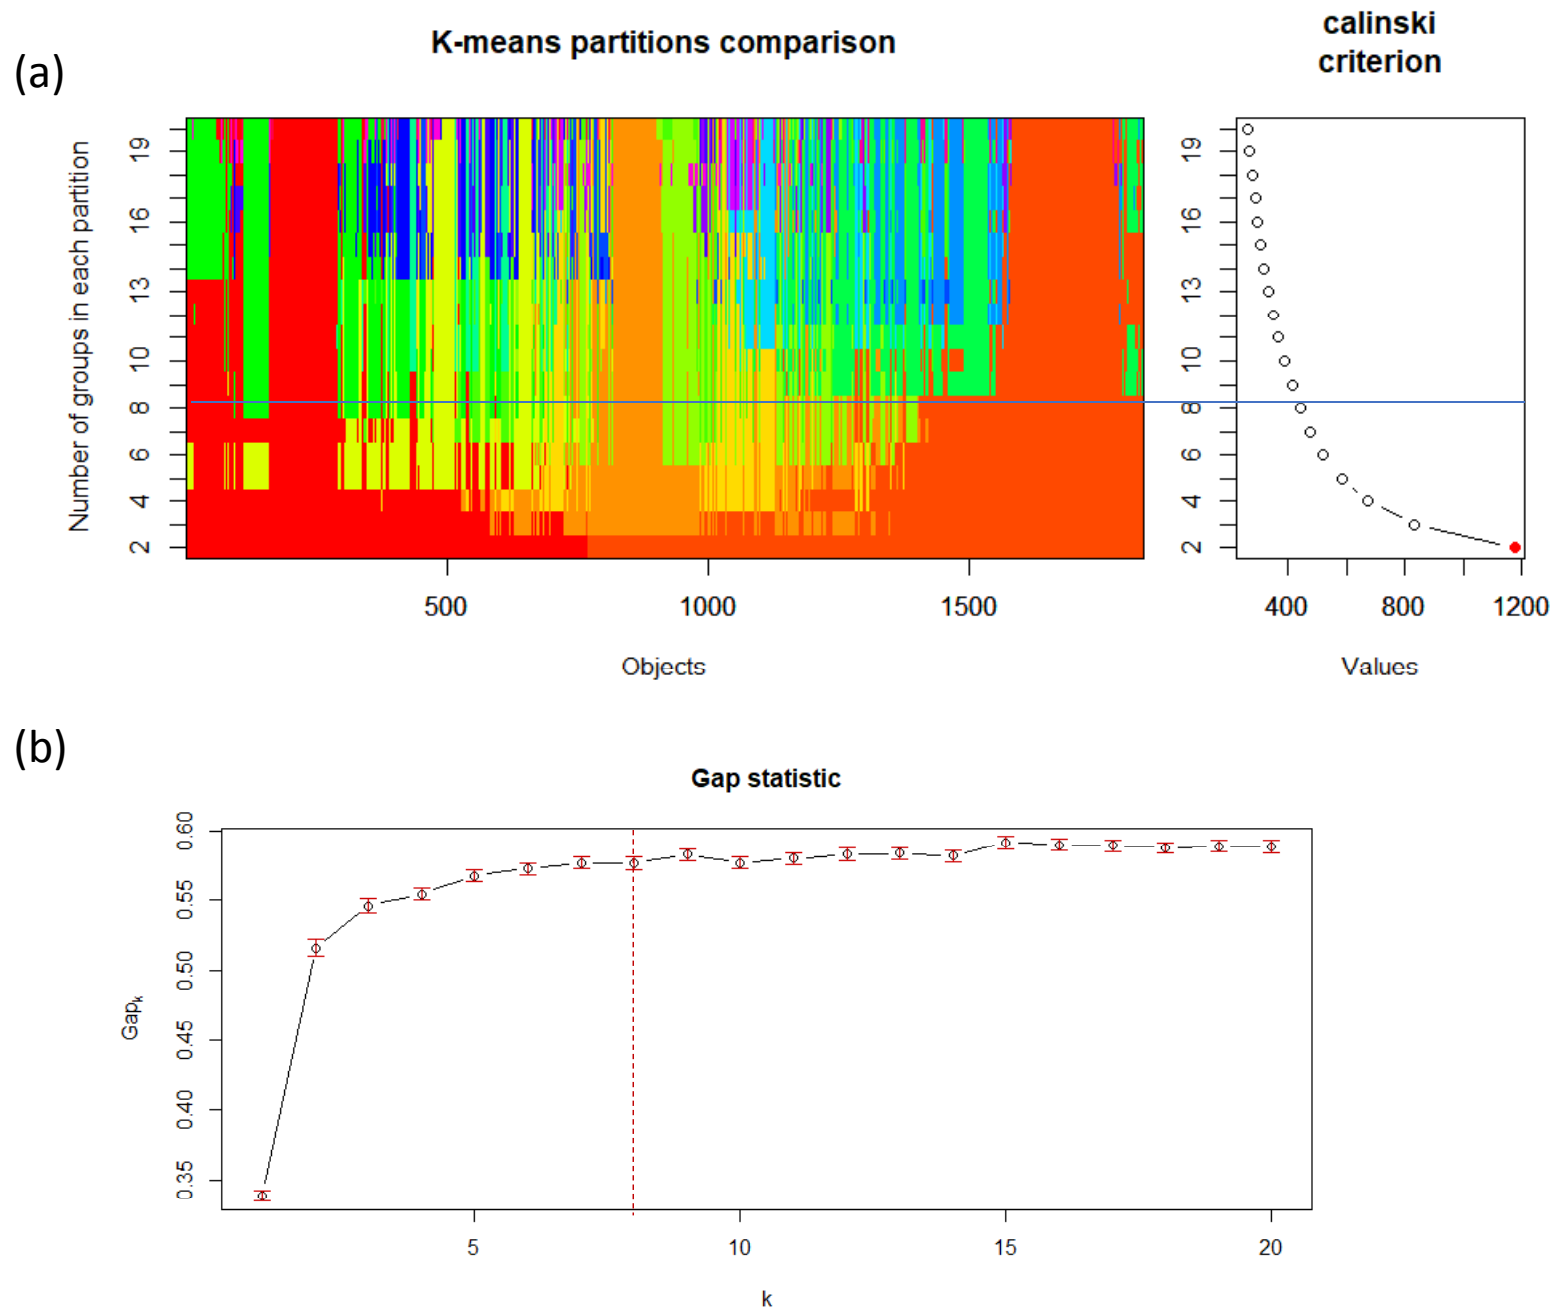

**Figure S3.** Determination of the optimum number of clusters for K-means analysis: **(a)** heat map of the hierarchical clustering analysis; **(b)** a posteriori validation of cluster number using maximum centroid correlation values with threshold below 0.8

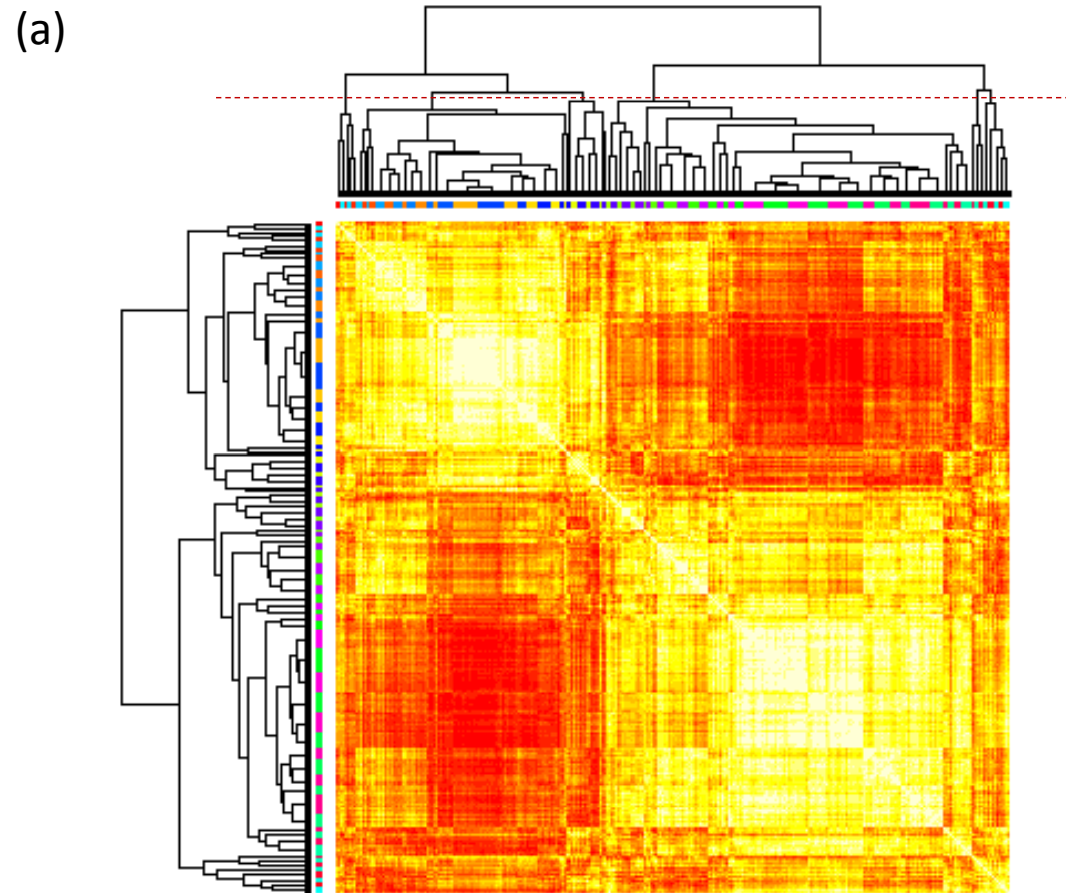

(b)

| Cluster | 2    | 3   | 4   | 5   | 6   | 7   | 8   | 9   |
|---------|------|-----|-----|-----|-----|-----|-----|-----|
| Max CC  | -0.8 | 0.3 | 0.4 | 0.6 | 0.6 | 0.7 | 0.7 | 0.8 |

MaxCC = maximum centroid correlation

**Figure S4.** Correlation of cluster centroids for K-means cluster number = 8 : **(a)** plot of cluster centroids; **(b)** matrix of cluster centroids correlation values

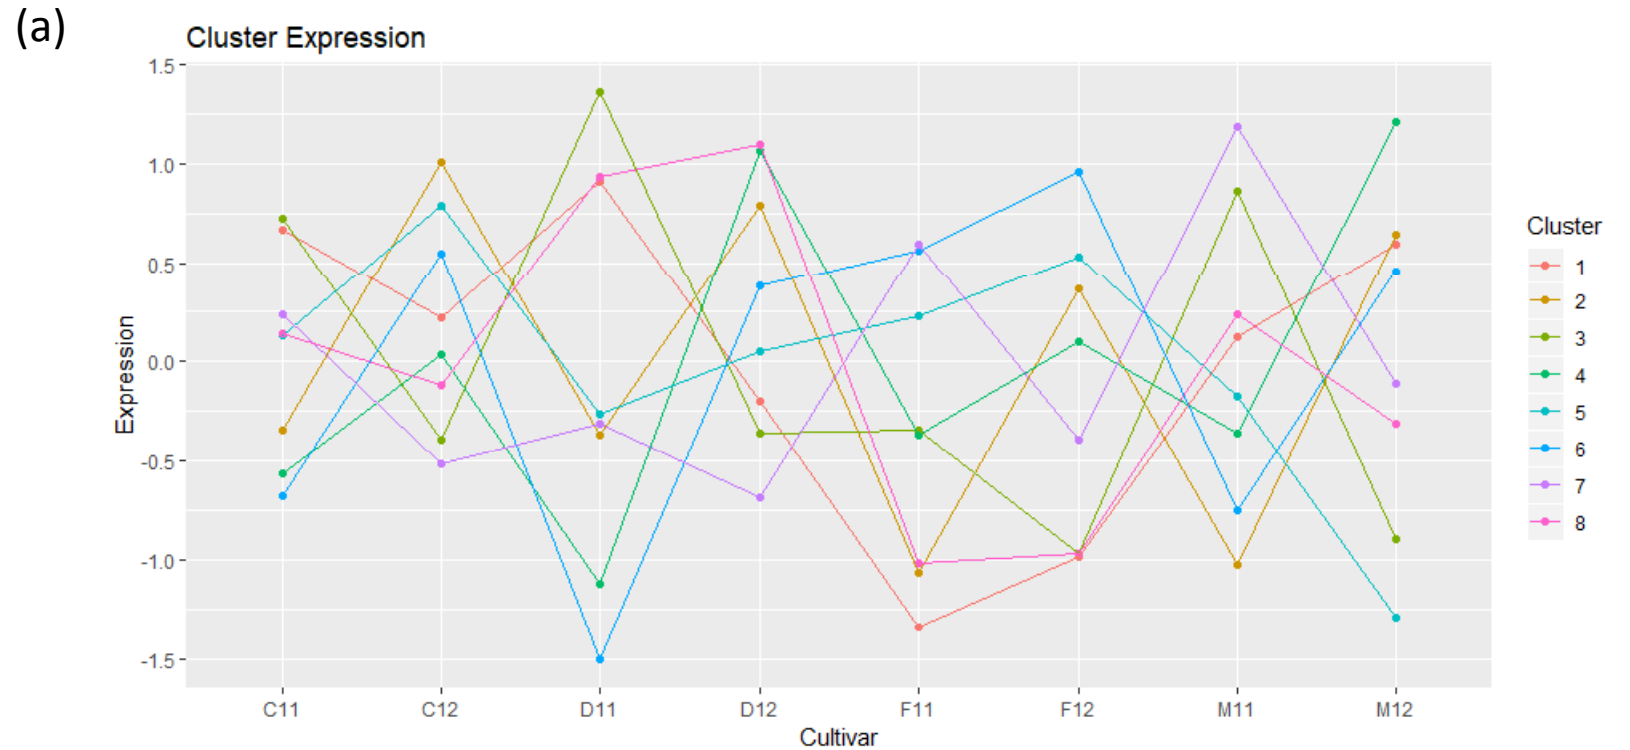

(b)

|   | 1          | 2           | 3           | 4           | 5           | 6          | 7          | 8           |
|---|------------|-------------|-------------|-------------|-------------|------------|------------|-------------|
| 1 | 1.0000000  | 0.18024702  | 0.55554680  | -0.11655935 | -0.45831518 | -0.6816586 | -0.1256871 | 0.65279976  |
| 2 | 0.1802470  | 1.00000000  | -0.58282513 | 0.67701213  | 0.05389163  | 0.5027264  | -0.8572353 | 0.14563030  |
| 3 | 0.5555468  | -0.58282513 | 1.00000000  | -0.76288190 | -0.05100912 | -0.9724148 | 0.3864120  | 0.59100680  |
| 4 | -0.1165593 | 0.67701213  | -0.76288190 | 1.00000000  | -0.35019511 | 0.6670928  | -0.3856859 | -0.03170325 |
| 5 | -0.4583152 | 0.05389163  | -0.05100912 | -0.35019511 | 1.00000000  | 0.2494987  | -0.1664034 | -0.19244506 |
| 6 | -0.6816586 | 0.50272644  | -0.97241478 | 0.66709285  | 0.24949874  | 1.0000000  | -0.3173104 | -0.63428386 |
| 7 | -0.1256871 | -0.85723529 | 0.38641205  | -0.38568589 | -0.16640337 | -0.3173104 | 1.0000000  | -0.25311154 |
| 8 | 0.6527998  | 0.14563030  | 0.59100680  | -0.03170325 | -0.19244506 | -0.6342839 | -0.2531115 | 1.00000000  |

**Figure S5.** Ratio of Malondialdehyde (MDA) content and Carotenoids measurement in 'Domari', 'Myrna', 'Flester' and 'Confiance' plants. (Mean  $\pm$  SD, n = 3)

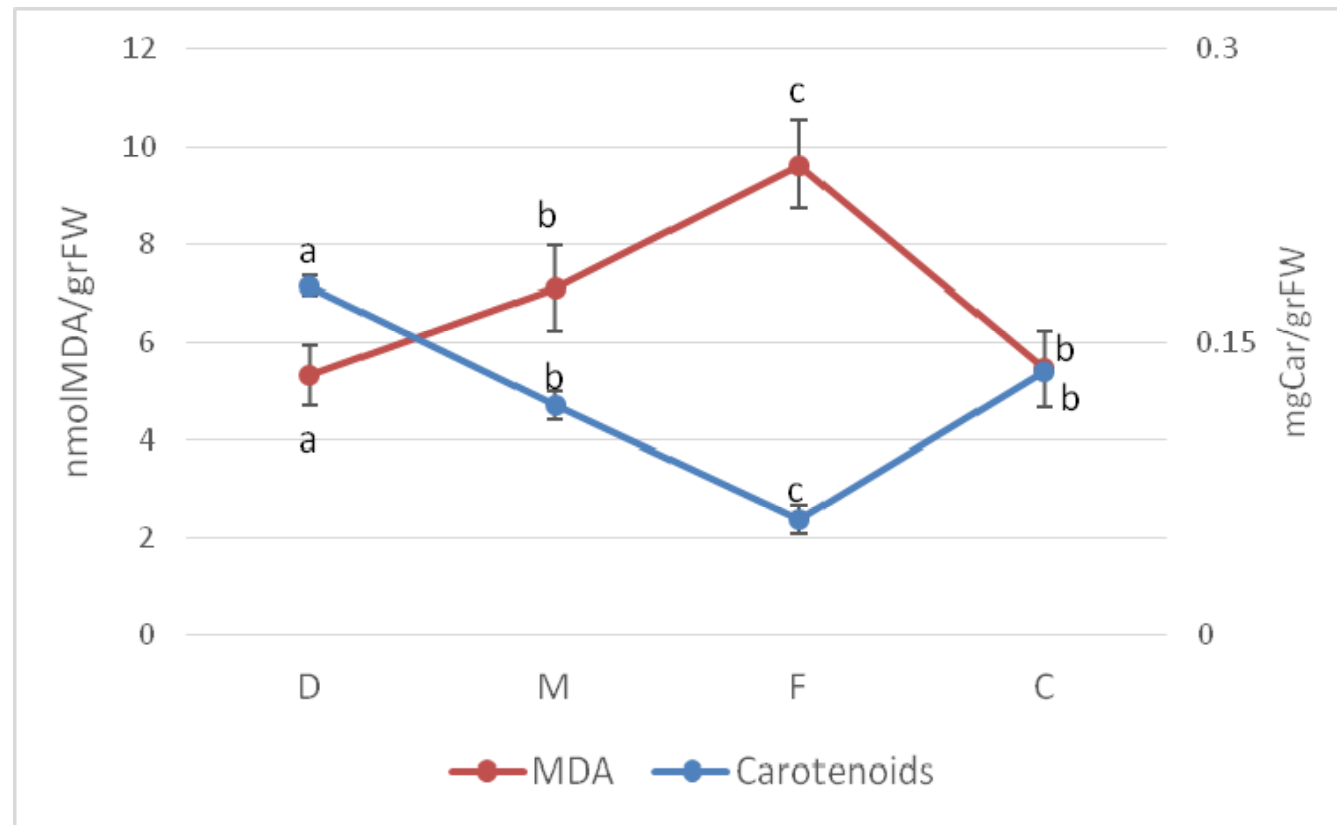

Supplement: s1 [file s1]
