# Supplementary material for: Transcription Factor Networks in Leaves of Cichorium endivia: New Insights into the Relationship between Photosynthesis and Leaf Development
Source: MDPI journal article supplement (doi:10.3390/plants8120531), 2019-11-21
Supplement: s1 [file s1]

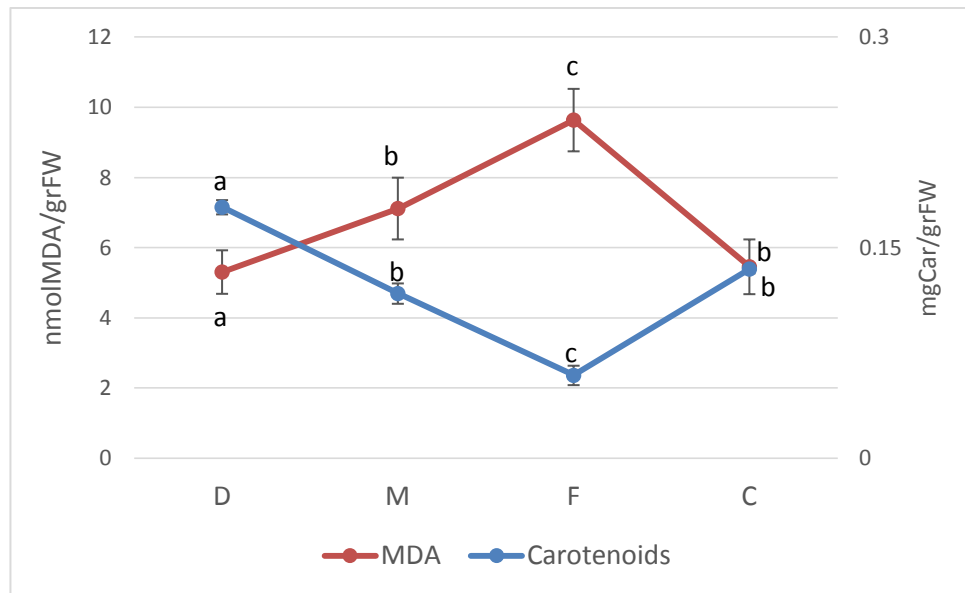

**Figure S1.** Ratio of leaf dry mass to leaf area (LMA) and ratio of leaf length to leaf width (LI) in 'Domari', 'Myrna', 'Flester' and 'Confiance' plants (Mean  $\pm$  SD, n = 6).
