# Supplementary material for: Transcription Factor Networks in Leaves of Cichorium endivia: New Insights into the Relationship between Photosynthesis and Leaf Development
Source: MDPI journal article supplement (doi:10.3390/plants8120531), 2019-11-21
Supplement: s1 [file s1]

**Table S7.** Several spectral reflectance indices

| Spectral reflectance indices                  | Computations <sup>1</sup>                   |
|-----------------------------------------------|---------------------------------------------|
| Normalized Difference Vegetation Index (NDVI) | $(R_{800} - R_{680}) / (R_{800} + R_{680})$ |
| Photochemical Reflectance Index (PRI)         | $(R_{531} - R_{570}) / (R_{531} + R_{570})$ |
| Stress Index (SI)                             | $R_{710} / R_{810}$                         |
| Water Index (WI)                              | $R_{900} / R_{970}$                         |
| Structural Independent Pigment Index (SIPI)   | $(R_{800} - R_{445}) / (R_{800} + R_{680})$ |
| Normalized Phaeophytinization Index (NPQI)    | $(R_{415} - R_{435}) / (R_{415} + R_{435})$ |

1, R indicates the reflectance in a band centered at a specific wavelength  $\lambda$
