# Supplementary material for: Transcription Factor Networks in Leaves of Cichorium endivia: New Insights into the Relationship between Photosynthesis and Leaf Development
Source: MDPI journal article supplement (doi:10.3390/plants8120531), 2019-11-21
Supplement: s1 [file s1]

**Table S5.** Chlorophyll fluorescence parameters (maximal quantum efficiency ( $F_v/F_m$ ) measured in dark adapted leaves and quantum efficiency of PSII photochemistry ( $\Phi$  PSII) measured at steady state with light intensity of  $370 \mu\text{mol photons m}^{-2} \text{s}^{-1}$ ) were obtained from 6 fully developed leaves of endives (cv. ‘Domari’ and ‘Myrna’) and escaroles (cv. ‘Flester’ and ‘Confiance’) cultivars grown under greenhouse conditions for X days (average data  $\pm$  SE; n=6). Four AOI (Area Of Interest) were selected, two in the internal part of the leaf and two in the external part in order to evaluate spatial heterogeneity. For each parameter a one-way analysis of variance (ANOVA) was applied and data followed by common letters in the same row are not significantly different (Student-Newman-Keuls test,  $P \leq 0.05$ ).

| Cultivar  | $F_v/F_m$ (rel. un.) |                     |          | $\Phi$ PSII (rel. un.) |                     |          |
|-----------|----------------------|---------------------|----------|------------------------|---------------------|----------|
|           | external             | internal            | <i>P</i> | external               | internal            | <i>P</i> |
| Domari    | $0.792 \pm 0.001$ a  | $0.794 \pm 0.001$ a | 0.32     | $0.410 \pm 0.004$ a    | $0.401 \pm 0.006$ a | 0.23     |
| Myrna     | $0.807 \pm 0.001$ a  | $0.806 \pm 0.001$ a | 0.58     | $0.379 \pm 0.005$ a    | $0.371 \pm 0.005$ a | 0.29     |
| Flester   | $0.828 \pm 0.001$ a  | $0.827 \pm 0.001$ a | 0.45     | $0.379 \pm 0.007$ a    | $0.371 \pm 0.003$ a | 0.30     |
| Confiance | $0.780 \pm 0.003$ a  | $0.782 \pm 0.001$ a | 0.72     | $0.423 \pm 0.009$ a    | $0.416 \pm 0.005$ a | 0.56     |
