# Supplementary material for: Transcription Factor Networks in Leaves of Cichorium endivia: New Insights into the Relationship between Photosynthesis and Leaf Development
Source: MDPI journal article supplement (doi:10.3390/plants8120531), 2019-11-21
Supplement: s1 [file s1]

**Table S6.** Primer list.

| Gene ID        | Amplicon (bp) | Name        | Tm   | Sequence (5'-3')         |
|----------------|---------------|-------------|------|--------------------------|
| Ce_contig84656 | 172           | BRX_1-F     | 62.9 | GCCTTGCTCCGGATCGTCAA     |
|                |               | BRX_1-R     | 63.2 | TCCACCACTCGAAAGCCCCT     |
| Ce_contig50460 | 200           | ERF_72-F    | 64.1 | GCTGACCGCCGACCTTTTACG    |
|                |               | ERF_72-R    | 64.4 | ACCGGAGCAGAGCCTTTGGAG    |
| Ce_contig5865  | 83            | MYB_77-F    | 62.6 | ATGTTGAGGAAAGGTGCATGGACT |
|                |               | MYB_77-R    | 63.1 | GTGCCACTTCCCTTCGCCAT     |
| Ce_contig75081 | 135           | Lhcb6_1-F   | 62.2 | CATCCTTCTTGTCCGGCGGA     |
|                |               | Lhcb6_1-R   | 63.0 | CGGCGGGGATCCAGGATTTC     |
| Ce_contig85637 | 194           | SIG_5-F     | 62.3 | GCTTTCCAATTGCCGAATCCGT   |
|                |               | SIG_5-R     | 62.0 | TCGAAAGCCCGGACACAAGT     |
| Ce_contig68433 | 117           | ARR-B_7-F   | 62.7 | CTGGCATGCTTGGTAGGCTCA    |
|                |               | ARR-B_7-R   | 62.3 | TTGCGGGTACAACCTGGCTGT    |
| Ce_contig1428  | 121           | G2-like_1-F | 63.0 | CCACCACCAGCACCACATGT     |
|                |               | G2-like_1-R | 63.2 | TGGCATGGGGTGGTGGGATA     |
| Ce_contig68890 | 75            | ACT-F       | 61.9 | GCCAAATCCAGCTCATCAGTCG   |
|                |               | ACT-R       | 61.6 | TCTTTCGGCTCCGATGGTGAT    |
